# Supplementary material for: Polar and subpolar shelf seas dominate enhanced coastal CO2 uptake during marine heatwaves
Source: Research Square preprint supplement (doi:10.21203/rs.3.rs-7934842/v1), 2025-11-20
Supplement: Supplementary file 1 [file 19173ebc08e6f2b404530376.docx]

Supplementary Information for

Polar and subpolar shelf seas dominate enhanced coastal CO2 uptake during marine heatwaves

Zhentao Hu1,2, Moritz Mathis1, Hongmei Li1,3, Tatiana Ilyina1,2,3, Yoana G. Voynova4, Vlad A. Macovei4, Feng Zhou5,6, Qicheng Meng5,6, Corinna Schrum1,2 & Wenyan Zhang1*

1Institute of Coastal Systems – Analysis and Modeling, Helmholtz-Zentrum Hereon, Geesthacht, Germany.

2Institute of Oceanography, Center for Earth System Research and Sustainability, University of Hamburg, Hamburg, Germany.

3Department of Climate Variability, Max Planck Institute for Meteorology, Hamburg, Germany.

4Department of Coastal Productivity, Institute of Carbon Cycles, Helmholtz-Zentrum Hereon, Geesthacht, Germany.

5State Key Laboratory of Satellite Ocean Environment Dynamics, Second Institute of Oceanography, Ministry of Natural Resources, Hangzhou, China.

6Observation and Research Station of Yangtze River Delta Marine Ecosystems, Ministry of Natural Resources, Zhoushan, China.

*Corresponding author: Wenyan Zhang ([wenyan.zhang@hereon.de](mailto:wenyan.zhang@hereon.de))

**
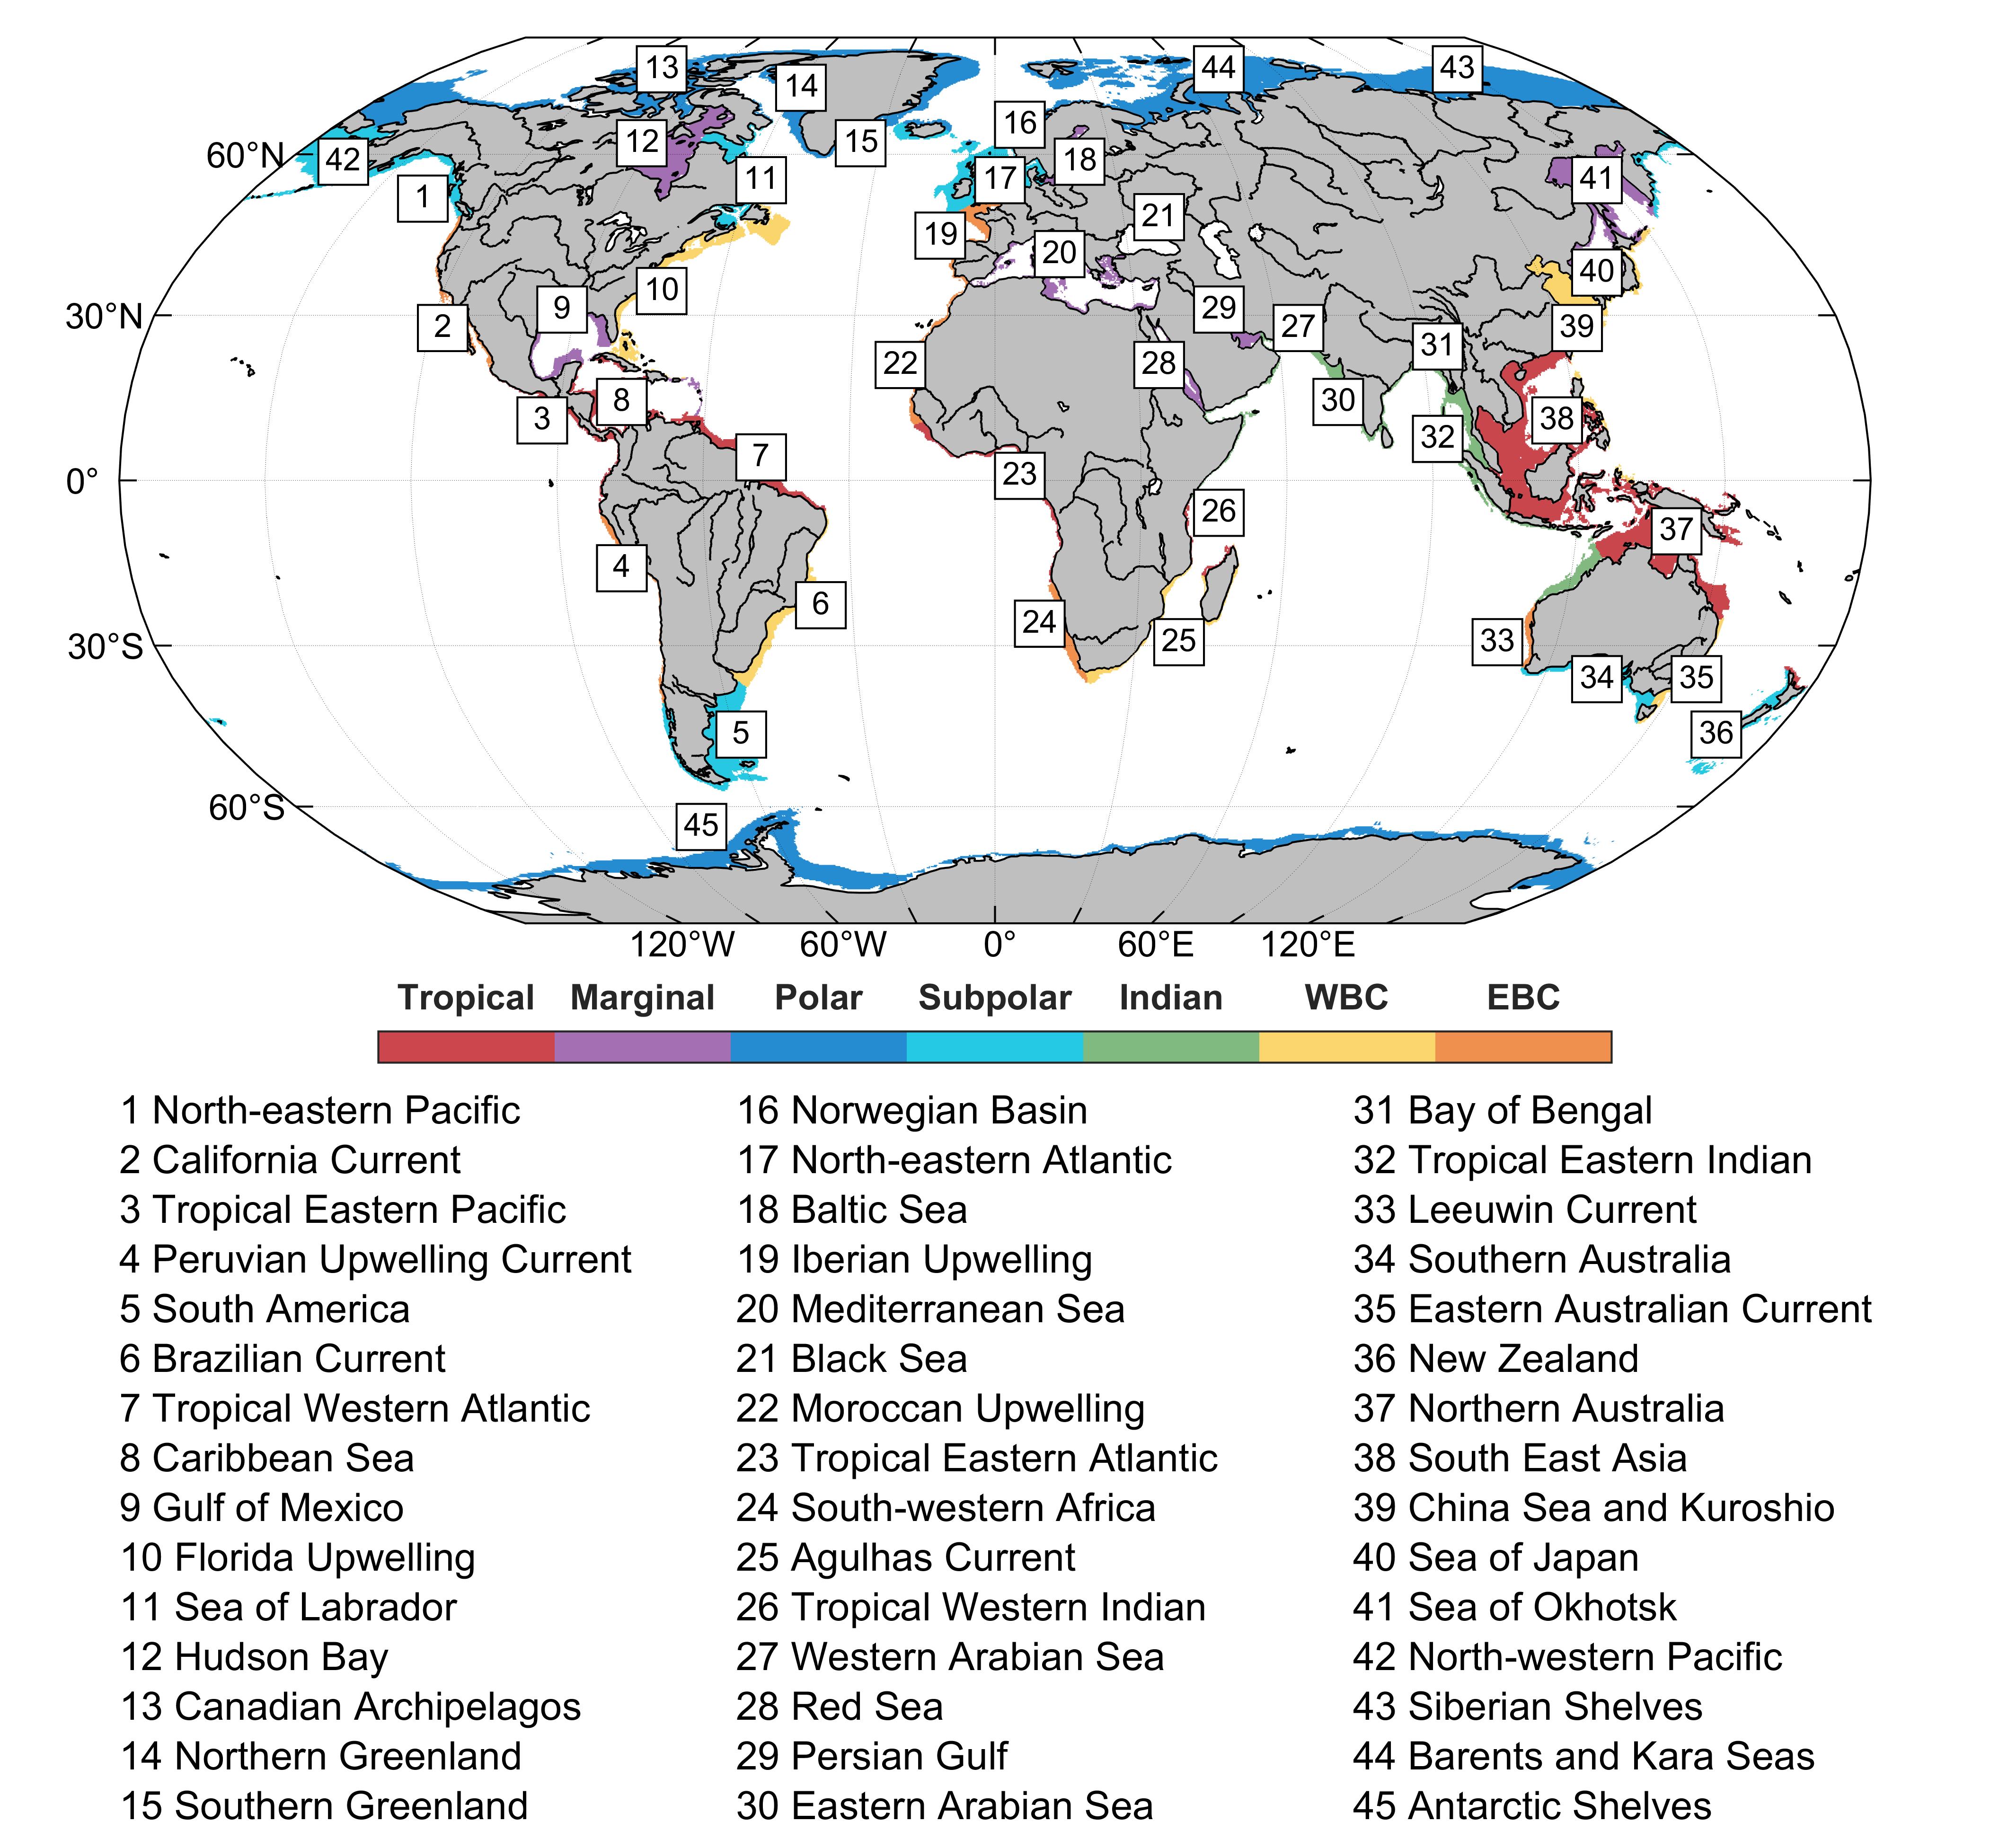
**

**Supplementary Fig. 1 | Segmentation of the coastal ocean.** Global continental shelf seas divided into 45 MARCATS regions1, grouped into seven categories: eastern boundary currents (EBC), western boundary currents (WBC), Indian margins, subpolar margins, polar margins, marginal seas, and tropical margins. The figure is adopted from Roobaert et al.2, with major rivers added for context.


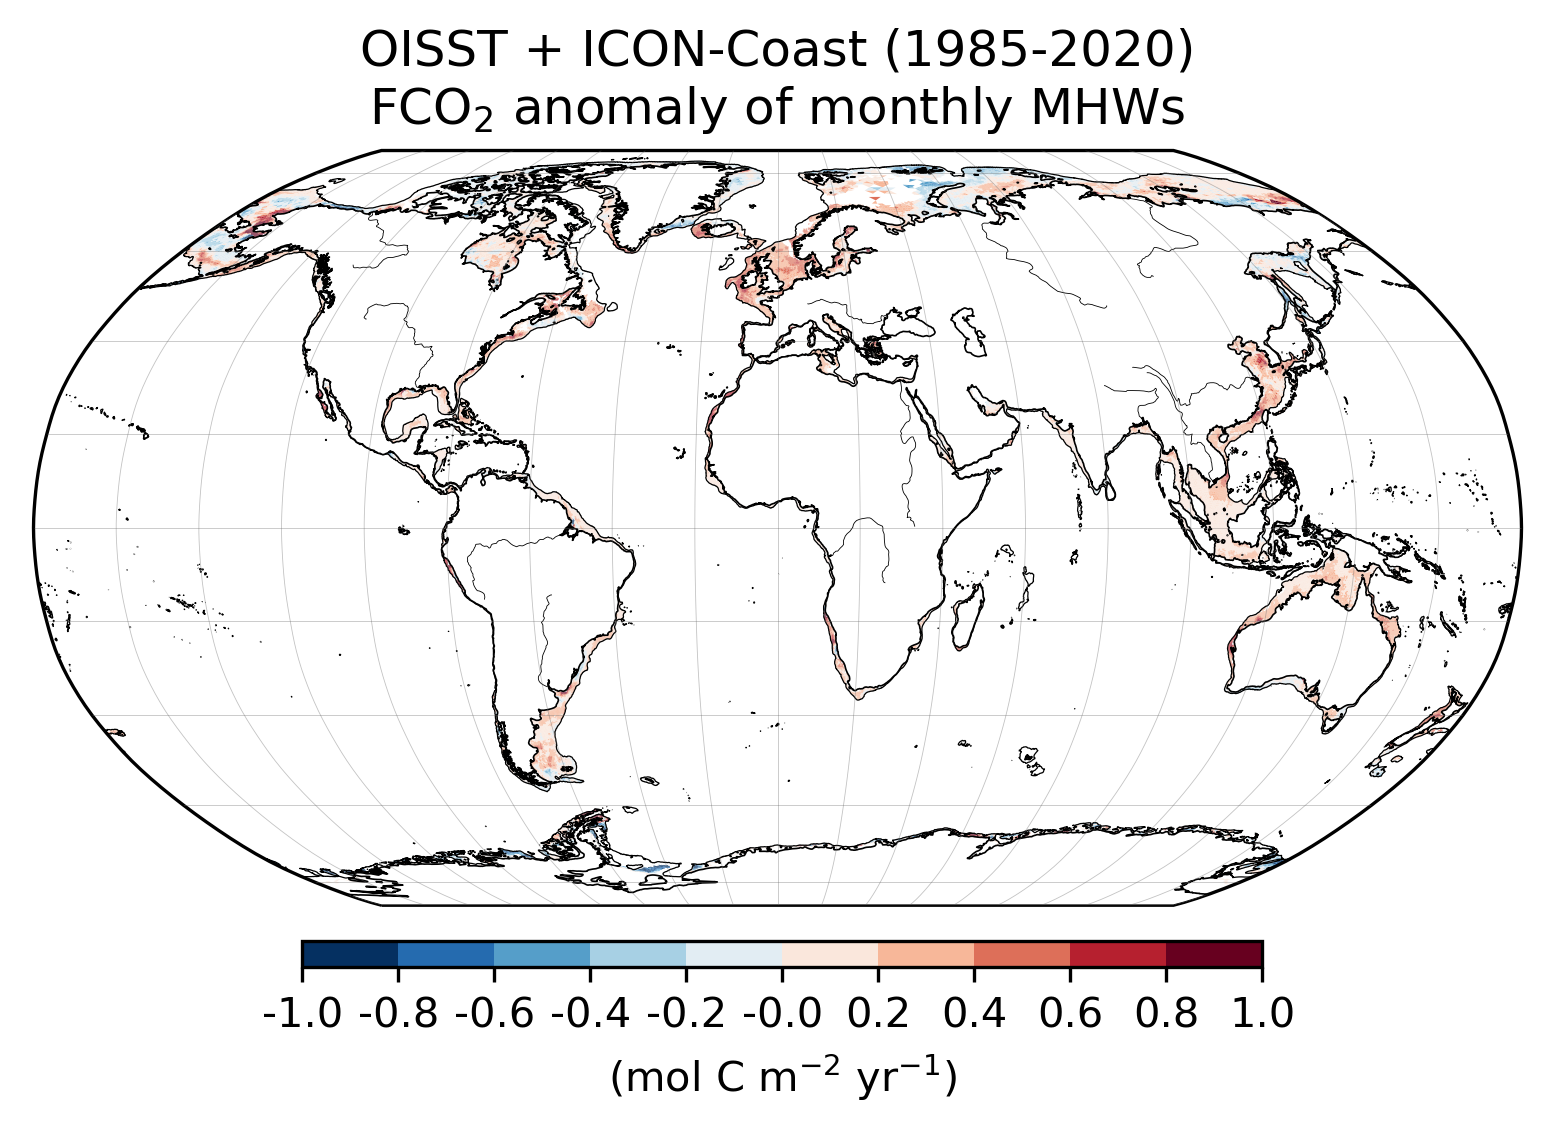


**Supplementary Fig. 2 | Coastal *F*CO2 responses to MHWs simulated by ICON-Coast.** Spatial distribution of averaged air–sea *F*CO2 anomalies (mol C m-2 yr-1) across the global coastal regions, derived from ICON-Coast simulations.

**
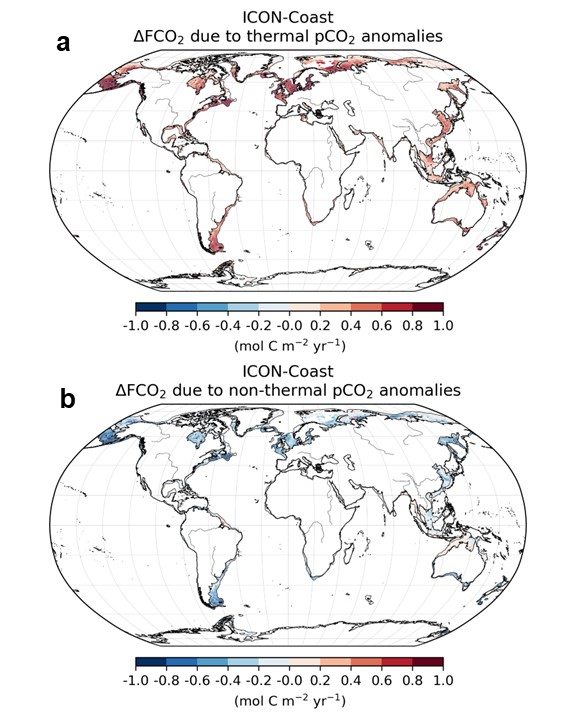
**

**Supplementary Fig. 3 | Averaged contributions to *F*CO2 anomalies simulated by ICON-Coast.** Spatial distribution of thermal (**a**) and non-thermal (**b**) components of *p*CO2,sea contributing to air–sea *F*CO2 anomalies (1985–2020), as simulated by ICON-Coast.

**
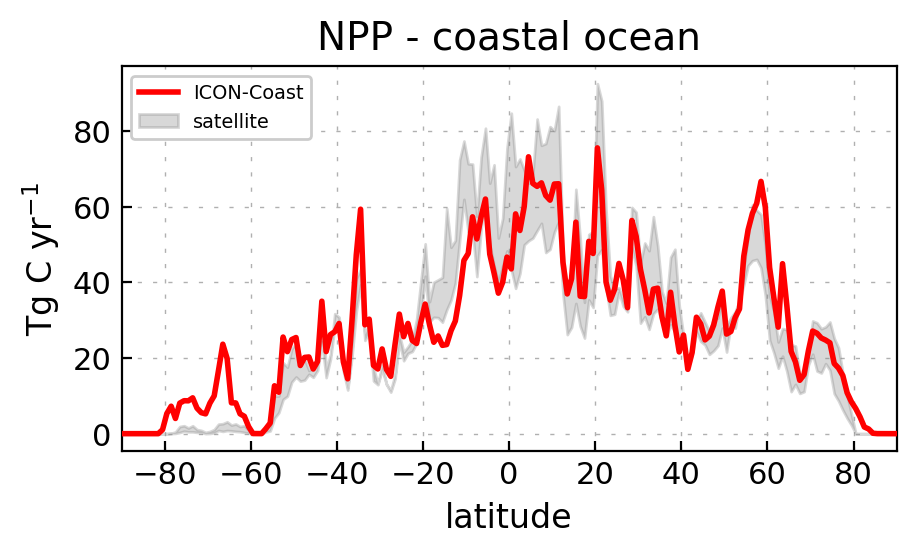
**

**Supplementary Fig. 4 | Primary productivity in the coastal ocean.** Zonally integrated annual net primary production in the coastal ocean, simulated by ICON-Coast (2001–2020, red) and calculated from the two satellite products (shaded grey) CBPM-VIIRS (2012–2020) and CAFE-MODIS (2003–2020).

**
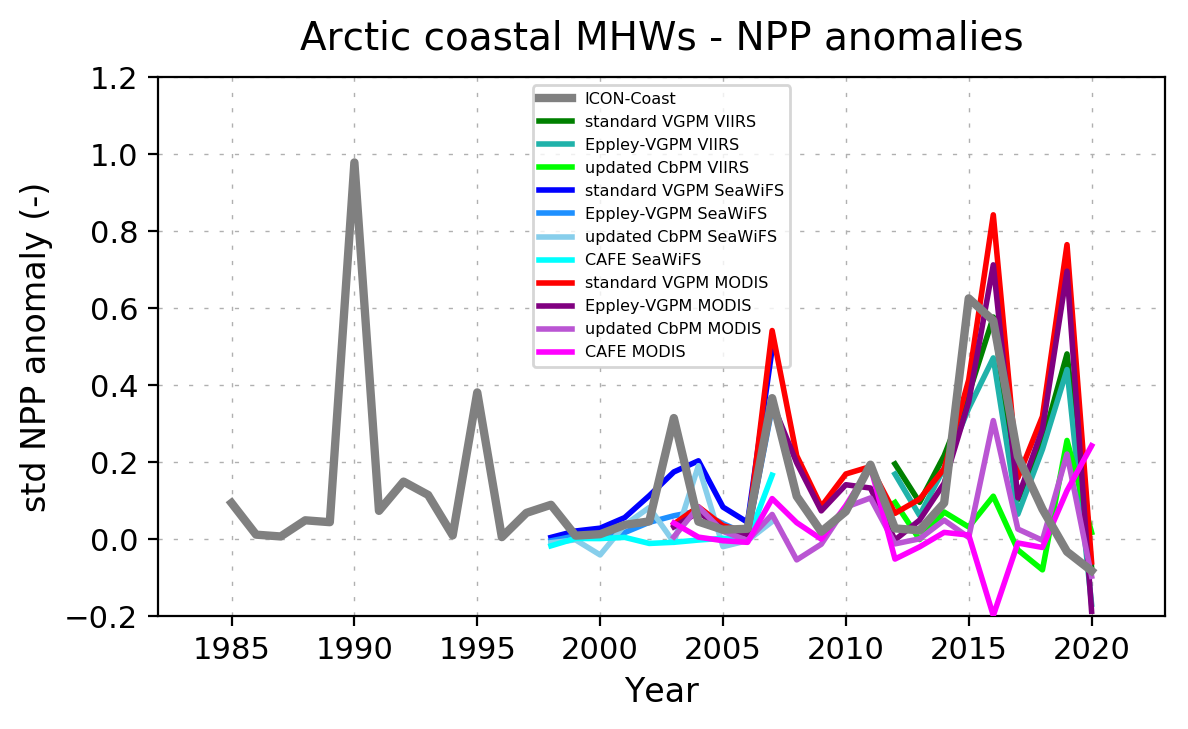
**

**Supplementary Fig. 5 | Impact of MHWs on Arctic primary productivity.** Standardized anomalies of annual net primary production (NPP) on Arctic shelves (>66°N) induced by MHWs, simulated by ICON-Coast (grey) and calculated from various satellite products named in the figure legend.

**
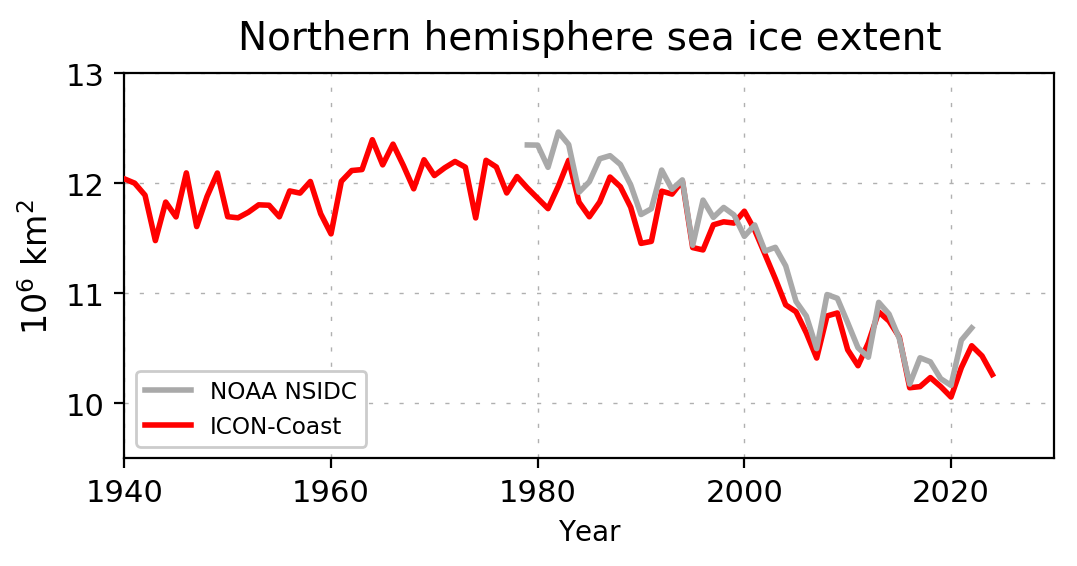
**

**Supplementary Fig. 6 | Sea ice cover in the Arctic Ocean.** Annual mean sea ice extent in the northern hemisphere, simulated by ICON-Coast (red) and compared with NOAA-NSIDC remote sensing observations.

**Supplementary Table 1 | Trends in sea ice loss and MHW month grids for typical polar and subpolar shelf seas**

| MARCATS identifier | Region name | Class | Trend of sea ice: Slope ± 95% CI (*P* value) | Trend of MHW month grids: Slope ± 95% CI (*P* value) |
| --- | --- | --- | --- | --- |
| 12 | Hudson Bay | Marginal / Subpolar | –0.69×103 ± 2.56×103 yr-1 (*P* = 0.586) | 95 ± 65 yr-1 (*P* = 0.006) |
| 13 | Canadian Archipelagos | Polar | –2.09×103 ± 1.43×103 yr-1 (*P* = 0.006) | 344 ± 117 yr-1 (*P* < 0.001) |
| 14 | Northern Greenland | Polar | –0.42×103 ± 1.38×103 yr-1 (*P* = 0.541) | 83 ± 56 yr-1 (*P* = 0.004) |
| 15 | Southern Greenland | Polar | –0.27×103 ± 1.05×103 yr-1 (*P* = 0.606) | 43 ± 32 yr-1 (*P* = 0.010) |
| 41 | Sea of Okhotsk | Marginal / Subpolar | –0.32×103 ± 2.23×103 yr-1 (*P* = 0.774) | 96 ± 40 yr-1 (*P* < 0.001) |
| 42 | North-western Pacific | Subpolar | –6.15×103 ± 4.94×103 yr-1 (*P* = 0.016) | 325 ± 144 yr-1 (*P* < 0.001) |
| 43 | Siberian Shelves | Polar | –9.27×103 ± 1.18×103 yr-1 (*P* = 0.119) | 941 ± 385 yr-1 (*P* < 0.001) |
| 44 | Barents and Kara Seas | Polar | –9.94×103 ± 7.58×103 yr-1 (*P* = 0.012) | 842 ± 340 yr-1 (*P* < 0.001) |
| 45 | Antarctic Shelves | Polar | 6.11×103 ± 4.28×103 yr-1 (*P* = 0.007) | –184 ± 69 yr-1 (*P* < 0.001) |

**Supplementary References**

1. Laruelle, G. G. et al. Global multi-scale segmentation of continental and coastal waters from the watersheds to the continental margins. *Hydrol. Earth Syst. Sc.* **17**, 2029–2051 (2013).

2. Roobaert, A. et al. The spatiotemporal dynamics of the sources and sinks of CO2 in the global coastal ocean. *Glob. Biogeochem. Cycles* **33**, 1693–1714 (2019).
